# Supplementary material
Source: HighWire-hosted journal article supplement (https://bmjopen.bmj.com/content/6/9/e011708)
Supplement: inline-supplementary-material-1 [file inline-supplementary-material-1.pdf]

## Appendix: Peer Responder Assessment Form

### I. SECOND VICTIM INITIAL CALL

1. Did the second victim encounter any barriers to accessing RISE?  
 Yes     No
2. Were there any barriers to setting up a time/place to meet with the second victim?  
 Yes     No
3. Was this the first time you responded to this second victim?  
 Yes     No
4. Had this person had spoken with another RISE Responder?  
 Yes     No
5. If he/she had spoke to another RISE provider, was it about the same event or a different event?  
 Same event     Different event

### II. ENCOUNTER WITH SECOND VICTIM

1. After meeting with the second victim, did you feel you were able to provide helpful support?  
 Yes     No
2. As you listened to the second victim, did you find yourself wanting to 'fix' the problem? If so, how did you respond to this feeling?
3. Was there a point during the discussion with the second victim when you struggled/felt uncomfortable?
4. What worked well during your encounter with the second victim?
5. Do you have worries or concerns that the second victim might have additional problems? If yes, what were they?  
 Yes \_\_\_\_\_  
 No
6. Did you experience any worries or concerns about how you responded? If so, please describe them.
7. Was there information you would have liked to have had prior to the encounter? If so, please describe.

### III. TRAINING/EDUCATION:

1. I felt comfortable listening to the second victim.  
 Strongly Disagree     Disagree     Agree     Strongly Agree
2. I felt comfortable responding to the second victim.  
 Strongly Disagree     Disagree     Agree     Strongly Agree
3. I need additional training/experience as a peer responder  
 Strongly Disagree     Disagree     Agree     Strongly Agree
4. I am comfortable with my knowledge and skill as a peer responder  
 Strongly Disagree     Disagree     Agree     Strongly Agree
5. I am highly competent as a peer responder  
 Strongly Disagree     Disagree     Agree     Strongly Agree
6. I would be able to train other peer responders  
 Strongly Disagree     Disagree     Agree     Strongly Agree
7. Which aspect of the Psychological First Aide (PFA) training you received was most beneficial to your role as a peer responder?  
 Lecture Presentation     Role Play     RAPID acronym     Video excerpts  
 Handouts     Narratives     Other \_\_\_\_\_
8. Please rate your overall competence as a peer responder:  
 Poor     Fair     Good     Very Good     Excellent

**IV. PEER RESPONDER OVERALL EXPERIENCE**

1. How would you rate your own emotional distress as a responder to this encounter (1 not at all painful-10 extremely painful)?  
 1     2     3     4     5     6     7     8     9     10
2. I felt the need to refer the second victim to additional resources:  
 Strongly Disagree     Disagree     Agree     Strongly Agree
3. I was able to offer the second victim additional helpful resources.  
 Strongly Disagree     Disagree     Agree     Strongly Agree
4. I felt confident in offering the second victim additional resources  
 Strongly Disagree     Disagree     Agree     Strongly Agree
5. If you offered the second victim additional resources, what were they?

**V. PEER RESPONDER RECOMMENDATIONS:**

1. Overall how would you rate the success of this encounter?  
 Poor     Neutral     Excellent
2. It was beneficial for the second victim to contact the RISE team:  
 Strongly Disagree     Disagree     Agree     Strongly Agree
3. I met the second victim's expectations:  
 Strongly Disagree     Disagree     Agree     Strongly Agree
4. I felt satisfied with how this encounter turned out:  
 Strongly Disagree     Disagree     Agree     Strongly Agree
5. This encounter suggests ways to improve the RISE program, including:  

---
